# Supplementary material for: Association Between Central Venous Pressure Trajectories Within the First 24 Hours of ICU Admission and Prognosis in Sepsis Patients: A Group-Based Trajectory Modeling Study Based on the MIMIC-IV 3.0 Database
Source: Research Square preprint supplement (doi:10.21203/rs.3.rs-6748188/v1), 2025-08-08
Supplement: Supplementary file 1 [file 40d083d8ba7fd8309a0e5b5d.xlsx]

## Sheet: Sheet
Variable Name	VIF
urineoutput	1.20510610268658
bmi	1.14068495385807
apsiii	2.18737197866373
sofa	2.73464165876853
itvtn_24h_vent_tag	1.22109163232947
itvtn_24h_rrt_tag	1.51813878692223
drug_24h_vaso_tag	1.2322423577717
icd_hf	1.17864488099705
icd_hypertension	1.20592997799562
icd_afib	1.185196257911
icd_diabetes	1.17870300371725
icd_renal	1.39845766391368
icd_malignancy	1.093486293998
vs_24h_map_first	4.38107038126394
vs_24h_sbp_first	2.28963927354097
vs_24h_dbp_first	3.21816690437062
vs_24h_heart_rate_first	1.2960732756829
vs_24h_resp_rate_first	1.25143285772008
vs_24h_spo2_first	1.10861481351104
lab_fst_24h_creatinine_first	2.69207767256022
lab_fst_24h_bun_first	2.00919980763909
lab_fst_24h_wbc_first	1.14167778586067
lab_fst_24h_hemoglobin_first	1.18258833055981
lab_fst_24h_platelet_first	1.39600879591186
lab_fst_24h_inr_first	30.2875234160705
lab_fst_24h_pt_first	30.1617245188518
lab_fst_24h_aptt_first	1.07199835759212
lab_fst_24h_cl_first	1.2311770414747
lab_fst_24h_na_first	1.07977449810761
lab_fst_24h_k_first	1.10540466720796
lab_fst_24h_bg_first	1.14789885004857
age	1.5067758648339
