# Supplementary material for: Association Between Central Venous Pressure Trajectories Within the First 24 Hours of ICU Admission and Prognosis in Sepsis Patients: A Group-Based Trajectory Modeling Study Based on the MIMIC-IV 3.0 Database
Source: Research Square preprint supplement (doi:10.21203/rs.3.rs-6748188/v1), 2025-08-08
Supplement: Supplementary file 2 [file 44f9e936e3a24ba1ecc4729a.xlsx]

## Sheet: Sheet
Variable Names	level	Overall	Missing	1	2	3	4	p	SMD
n		3068		618	1418	879	153
time1 (0-4hour)		15 (4-30)	0.0	10 (4-30)	14 (4-30)	19 (4-30)	24 (4-30)	<0.001	1.404
time2 (4-8hour)		14 (2-30)	0.0	8 (2-30)	13 (2-30)	18 (5-30)	26 (9-30)	<0.001	2.103
time3 (8-12hour)		13 (2-30)	0.0	7 (2-30)	12 (2-30)	18 (2-30)	26 (13-30)	<0.001	2.498
time4 (12-16hour)		13 (2-30)	0.0	7 (2-30)	12 (2-30)	17 (2-30)	26 (7-30)	<0.001	2.616
time5 (16-20hour)		13 (2-30)	0.0	8 (2-17)	12 (2-30)	18 (6-30)	25 (9-30)	<0.001	2.332
time6 (20-24hour)		13 (2-30)	0.0	7 (2-30)	12 (2-30)	17 (2-30)	24 (2-30)	<0.001	1.840
urineoutput		1590 (0-14415)	0.9	1722.5 (0-14415)	1645 (0-12905)	1483 (0-8673)	1011 (0-5695)	<0.001	0.328
age		68 (18-96)	0.0	67 (19-96)	69 (18-94)	68 (19-92)	66 (27-91)	0.152	0.079
bmi		28.51 (10.78-71.5)	12.1	26.22 (10.78-53.82)	28.515 (15.84-71.5)	30.01 (11.43-70.01)	29.515 (15.01-60.24)	<0.001	0.349
apsiii		44 (8-164)	0.0	41 (8-150)	42 (11-144)	49 (11-164)	57 (18-143)	<0.001	0.383
sofa		7 (0-19)	0.0	6 (0-17)	6 (0-19)	8 (0-18)	10 (1-18)	<0.001	0.605
map		76 (4-258)	0.2	77 (9-258)	76 (4-257)	76 (14-201)	74 (34-130)	0.070	0.117
sbp		111 (11-206)	0.2	113 (11-184)	111 (58-206)	111 (33-190)	107 (67-206)	0.006	0.147
dbp		59 (7-182)	0.2	59 (7-182)	59 (14-145)	59 (20-149)	59 (21-120)	0.844	0.029
heart_rate		83 (35-166)	0.2	81 (35-151)	82 (45-155)	84 (45-166)	90 (53-138)	<0.001	0.266
resp_rate		16 (2-54)	0.2	16 (4-45)	16 (2-54)	16 (6-48)	17 (7-38)	0.019	0.132
spo2		100 (51-100)	0.2	100 (57-100)	100 (62-100)	100 (51-100)	99 (60-100)	<0.001	0.203
creatinine		1 (0.1-15.3)	0.0	0.9 (0.2-12.6)	1 (0.1-15.3)	1.1 (0.3-12.6)	1.1 (0.4-9.1)	0.001	0.160
bun		19 (3-212)	0.0	18 (3-118)	18 (3-212)	20 (4-148)	21 (8-122)	<0.001	0.199
wbc		12.5 (0.1-100.6)	0.2	11.6 (0.1-80.8)	12.6 (0.4-66.1)	12.9 (0.5-100.6)	13.5 (2.1-95.4)	<0.001	0.175
hemoglobin		10 (1.7-18.6)	0.2	10.3 (1.7-16.7)	9.9 (4.9-18.6)	9.9 (3.2-18.3)	10.4 (6.1-17.1)	0.005	0.121
platelet		150 (11-961)	0.2	149 (11-961)	149 (13-745)	153 (12-797)	152 (28-583)	0.489	0.037
inr		1.4 (0.9-14.7)	2.8	1.4 (1-7.5)	1.4 (0.9-14.7)	1.5 (0.9-8)	1.6 (1-14.1)	<0.001	0.214
pt		15.8 (9.6-150)	2.8	15.55 (10.4-78.8)	15.7 (9.6-137.4)	16.1 (9.8-68.6)	17.5 (11-150)	<0.001	0.214
aptt		33.1 (18.9-150)	2.9	32.2 (20.3-150)	32.4 (18.9-150)	34.2 (20.2-150)	37.6 (21.8-150)	<0.001	0.196
cl		107 (81-405)	0.0	107 (82-135)	106 (81-405)	107 (84-132)	106 (83-119)	0.301	0.091
na		136 (119-1036)	0.0	137 (121-169)	136 (119-1036)	136 (120-159)	137 (126-149)	0.517	0.086
k		4.4 (1.6-8.2)	0.0	4.3 (1.8-8)	4.4 (2.2-8.2)	4.5 (1.6-7.8)	4.5 (2.5-7.9)	<0.001	0.130
glucose		141 (8-800)	0.0	141 (38-423)	139 (8-800)	147 (38-800)	130 (21-495)	0.012	0.073
ventilation (%)	0	570 (18.58)	0.0	175 (28.32)	270 (19.04)	107 (12.17)	18 (11.76)	<0.001	0.243
	1	2498 (81.42)		443 (71.68)	1148 (80.96)	772 (87.83)	135 (88.24)
rrt (%)	0	2961 (96.51)	0.0	603 (97.57)	1368 (96.47)	844 (96.02)	146 (95.42)	0.355	0.063
	1	107 (3.49)		15 (2.43)	50 (3.53)	35 (3.98)	7 (4.58)
vaso_use (%)	0	641 (20.89)	0.0	189 (30.58)	326 (22.99)	112 (12.74)	14 (9.15)	<0.001	0.324
	1	2427 (79.11)		429 (69.42)	1092 (77.01)	767 (87.26)	139 (90.85)
hf (%)	0	2096 (68.32)	0.0	488 (78.96)	965 (68.05)	556 (63.25)	87 (56.86)	<0.001	0.259
	1	972 (31.68)		130 (21.04)	453 (31.95)	323 (36.75)	66 (43.14)
hypertension (%)	0	919 (29.95)	0.0	207 (33.50)	403 (28.42)	262 (29.81)	47 (30.72)	0.149	0.058
	1	2149 (70.05)		411 (66.50)	1015 (71.58)	617 (70.19)	106 (69.28)
afib (%)	0	2149 (70.05)	0.0	512 (82.85)	1012 (71.37)	540 (61.43)	85 (55.56)	<0.001	0.342
	1	919 (29.95)		106 (17.15)	406 (28.63)	339 (38.57)	68 (44.44)
diabetes (%)	0	2128 (69.36)	0.0	454 (73.46)	981 (69.18)	583 (66.33)	110 (71.90)	0.027	0.088
	1	940 (30.64)		164 (26.54)	437 (30.82)	296 (33.67)	43 (28.10)
renal (%)	0	2435 (79.37)	0.0	504 (81.55)	1137 (80.18)	684 (77.82)	110 (71.90)	0.031	0.125
	1	633 (20.63)		114 (18.45)	281 (19.82)	195 (22.18)	43 (28.10)
malignancy (%)	0	2714 (88.46)	0.0	517 (83.66)	1258 (88.72)	803 (91.35)	136 (88.89)	<0.001	0.118
	1	354 (11.54)		101 (16.34)	160 (11.28)	76 (8.65)	17 (11.11)
gender (%)	Female	1148 (37.42)	0.0	195 (31.55)	534 (37.66)	354 (40.27)	65 (42.48)	0.003	0.123
	Male	1920 (62.58)		423 (68.45)	884 (62.34)	525 (59.73)	88 (57.52)
race_ (%)	White	2174 (70.86)	0.0	441 (71.36)	1017 (71.72)	619 (70.42)	97 (63.40)	0.767	0.101
	Black	177 (5.77)		36 (5.83)	82 (5.78)	48 (5.46)	11 (7.19)
	Asian	92 (3.00)		17 (2.75)	40 (2.82)	28 (3.19)	7 (4.58)
	Other	625 (20.37)		124 (20.06)	279 (19.68)	184 (20.93)	38 (24.84)
icu_outcome (%)	0	2817 (91.82)	0.0	588 (95.15)	1339 (94.43)	778 (88.51)	112 (73.20)	<0.001	0.353
icu_outcome (%)	1	251 (8.18)		30 (4.85)	79 (5.57)	101 (11.49)	41 (26.80)
hos_outcome (%)	0	2759 (89.93)	0.0	578 (93.53)	1306 (92.10)	766 (87.14)	109 (71.24)	<0.001	0.334
hos_outcome (%)	1	309 (10.07)		40 (6.47)	112 (7.90)	113 (12.86)	44 (28.76)
day28_outcome (%)	0	2746 (89.50)	0.0	570 (92.23)	1294 (91.26)	772 (87.83)	110 (71.90)	<0.001	0.294
day28_outcome (%)	1	322 (10.50)		48 (7.77)	124 (8.74)	107 (12.17)	43 (28.10)
day30_outcome (%)	0	2739 (89.28)	0.0	569 (92.07)	1289 (90.90)	771 (87.71)	110 (71.90)	<0.001	0.290
day30_outcome (%)	1	329 (10.72)		49 (7.93)	129 (9.10)	108 (12.29)	43 (28.10)
day60_outcome (%)	0	2666 (86.90)	0.0	555 (89.81)	1258 (88.72)	746 (84.87)	107 (69.93)	<0.001	0.275
day60_outcome (%)	1	402 (13.10)		63 (10.19)	160 (11.28)	133 (15.13)	46 (30.07)
day90_outcome (%)	0	2637 (85.95)	0.0	550 (89.00)	1243 (87.66)	739 (84.07)	105 (68.63)	<0.001	0.274
day90_outcome (%)	1	431 (14.05)		68 (11.00)	175 (12.34)	140 (15.93)	48 (31.37)
day180_outcome (%)	0	2568 (83.70)	0.0	535 (86.57)	1209 (85.26)	722 (82.14)	102 (66.67)	<0.001	0.256
day180_outcome (%)	1	500 (16.30)		83 (13.43)	209 (14.74)	157 (17.86)	51 (33.33)
year1_outcome (%)	0	2497 (81.39)	0.0	518 (83.82)	1178 (83.07)	703 (79.98)	98 (64.05)	<0.001	0.244
year1_outcome (%)	1	571 (18.61)		100 (16.18)	240 (16.93)	176 (20.02)	55 (35.95)
