# Supplementary material for: Association Between Central Venous Pressure Trajectories Within the First 24 Hours of ICU Admission and Prognosis in Sepsis Patients: A Group-Based Trajectory Modeling Study Based on the MIMIC-IV 3.0 Database
Source: Research Square preprint supplement (doi:10.21203/rs.3.rs-6748188/v1), 2025-08-08
Supplement: Supplementary file 3 [file d9e036baa69046d4107dc516.xlsx]

## Sheet: Sheet
Variable	Group	Count	Percent	OR	CI_2.5	CI_97.5	P_for_Interaction
Age							0.306184
<65
	1	258	21.2171
	2	547	44.9836	1.57388	0.700125	4.01221
	3	344	28.2895	3.80478	1.75357	9.5049
	4	67	5.50987	14.1935	5.89285	38.0642
>=65
	1	360	19.4384
	2	871	47.0302	1.00678	0.617588	1.69257
	3	535	28.8877	2.13351	1.32245	3.56118
	4	86	4.64363	5.03668	2.64091	9.61168
Gender							0.247476
Female
	1	195	16.9861
	2	534	46.5157	1.0752	0.586073	2.08645
	3	354	30.8362	1.83502	1.00245	3.55777
	4	65	5.66202	4.57887	2.11385	10.0871
Male
	1	423	22.0312
	2	884	46.0417	1.14258	0.641191	2.12953
	3	525	27.3438	3.09816	1.79371	5.65332
	4	88	4.58333	9.53906	4.84808	19.2538
Ventilation							0.0224928
No
	1	175	30.7018
	2	270	47.3684	0.439163	0.156706	1.16581
	3	107	18.7719	3.11667	1.39123	7.3338
	4	18	3.15789	8.25	2.46287	26.4783
Yes
	1	443	17.7342
	2	1148	45.9568	1.41524	0.868209	2.41118
	3	772	30.9047	2.58227	1.59468	4.37917
	4	135	5.40432	7.4025	4.13925	13.5774
RRT							0.68759
No
	1	603	20.3647
	2	1368	46.2006	1.07418	0.691921	1.71109
	3	844	28.5039	2.29978	1.49933	3.63121
	4	146	4.93077	6.97084	4.10954	11.9546
Yes
	1	15	14.0187
	2	50	46.729	1.83333	0.418259	12.8557
	3	35	32.7103	5.47368	1.26325	38.4417
	4	7	6.54206	8.66667	1.15996	90.487
Vasoactive_drug_use							0.417554
No
	1	189	29.4852
	2	326	50.858	1.63734	0.741646	3.98929
	3	112	17.4727	3.49871	1.46631	8.9627
	4	14	2.18409	3.77083	0.530813	17.2372
Yes
	1	429	17.6761
	2	1092	44.9938	1.01884	0.623785	1.72175
	3	767	31.6028	2.33627	1.46597	3.87796
	4	139	5.72724	7.215	4.13212	12.8942
Heart_failure							0.0795511
No
	1	488	23.2824
	2	965	46.0401	1.35518	0.781928	2.45787
	3	556	26.5267	3.41426	2.0104	6.10745
	4	87	4.15076	10.5546	5.41219	21.0307
Yes
	1	130	13.3745
	2	453	46.6049	0.73031	0.381667	1.4767
	3	323	33.2305	1.27208	0.672711	2.55307
	4	66	6.79012	3.12245	1.41649	7.03658
Hypertension							0.186988
No
	1	207	22.5245
	2	403	43.852	0.724138	0.389597	1.37339
	3	262	28.5092	1.72667	0.964388	3.19501
	4	47	5.11425	5.95	2.75998	12.9
Yes
	1	411	19.1252
	2	1015	47.2313	1.83186	1.00255	3.62818
	3	617	28.711	3.8481	2.12577	7.57606
	4	106	4.93253	9.73171	4.76578	20.8863
Atrial_fibrillation							0.0171464
No
	1	512	23.825
	2	1012	47.0917	1.54869	0.928267	2.69819
	3	540	25.128	3.8645	2.339	6.68942
	4	85	3.95533	10.8114	5.64946	21.0387
Yes
	1	106	11.5343
	2	406	44.1785	0.494792	0.236385	1.0922
	3	339	36.8879	0.869244	0.432448	1.86959
	4	68	7.39935	2.65734	1.15886	6.29723
Diabetes							0.817171
No
	1	454	21.3346
	2	981	46.0996	1.29567	0.788921	2.20851
	3	583	27.3966	2.63222	1.61205	4.46984
	4	110	5.16917	7.73214	4.24099	14.348
Yes
	1	164	17.4468
	2	437	46.4894	0.869391	0.401246	2.03686
	3	296	31.4894	2.30949	1.12654	5.2318
	4	43	4.57447	5.92014	2.27271	15.8452
Malignancy							0.957717
No
	1	517	19.0494
	2	1258	46.3522	1.18619	0.73339	1.98966
	3	803	29.5873	2.66365	1.67405	4.41532
	4	136	5.01105	7.20874	4.06333	13.025
Yes
	1	101	28.5311
	2	160	45.1977	1.29167	0.545166	3.29684
	3	76	21.4689	3.1	1.28118	8.06484
	4	17	4.80226	10.3333	3.1471	35.3404
Renal_disease							0.0996743
No
	1	504	20.6982
	2	1137	46.694	1.03608	0.642509	1.72018
	3	684	28.0903	2.64901	1.67876	4.32948
	4	110	4.51745	8.57143	4.83134	15.4296
Yes
	1	114	18.0095
	2	281	44.3918	1.60465	0.674517	4.44239
	3	195	30.8057	2.17241	0.899158	6.07211
	4	43	6.79305	4.11429	1.3418	13.2829
